# Supplementary material
Source: PubMed Central journal article supplement (PMC3839741)
Supplement: 1312648110_pnas.201312648SI.pdf [file 1312648110_pnas.201312648SI.pdf]

# Supporting Information

Van Le et al. 10.1073/pnas.1312648110

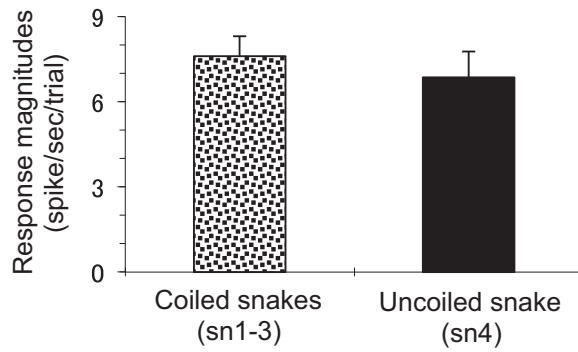

Fig. S1. Mean response magnitudes to the coiled and uncoiled snake photos. Statistical comparison indicated that there was no significant difference in response magnitudes (paired  $t$  test,  $P > 0.05$ ).

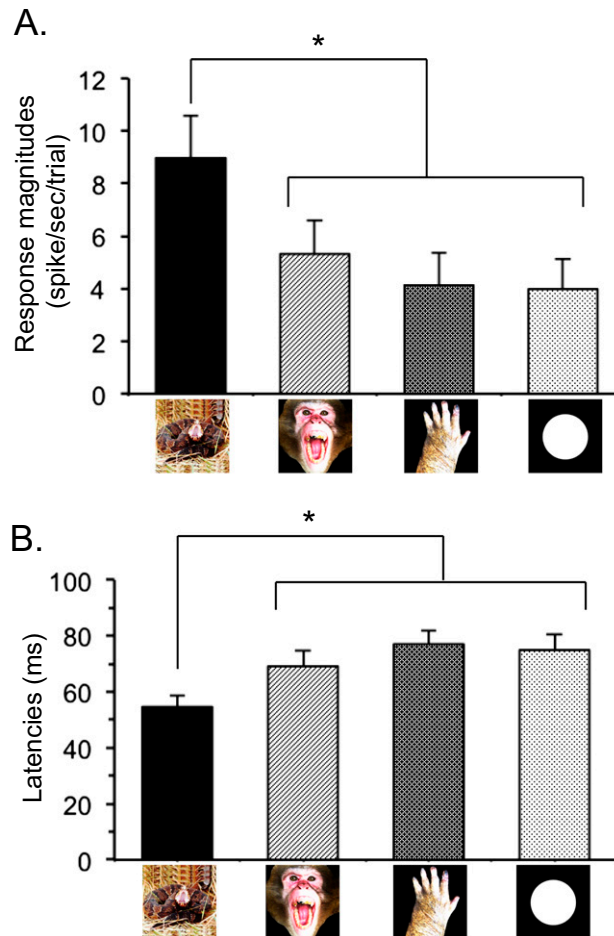

Fig. S2. Mean response magnitude (A) and latency (B) to each stimulus in each category presented in the first trial of the block.  $*P < 0.05$ , significant difference (Bonferroni test after repeated one-way ANOVA).



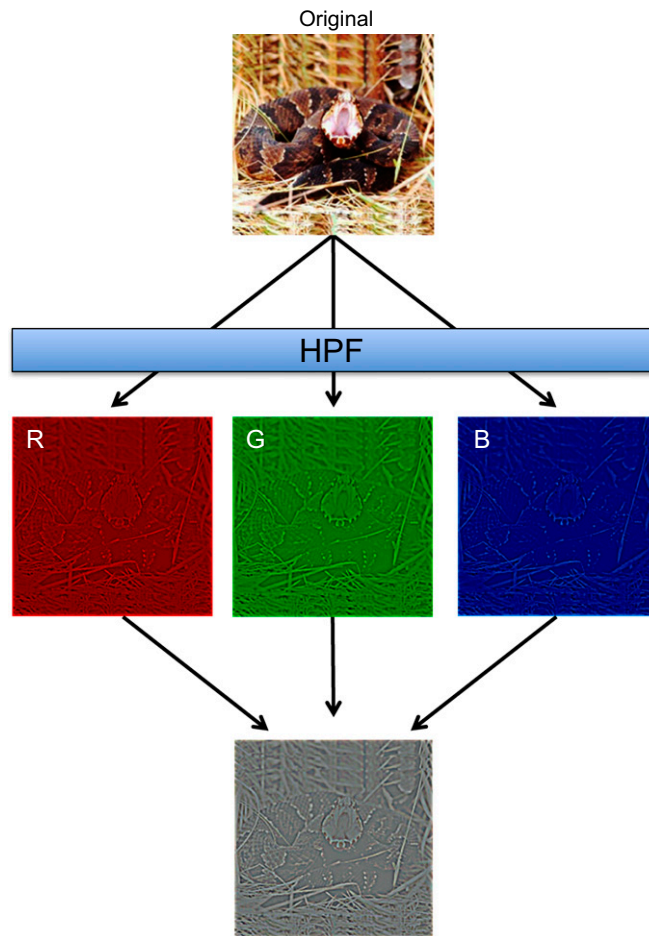

Fig. S4. Schematic illustration of processes of HPF.
